# Combined Effects of Energy Development and Disease on Greater Sage-Grouse

Rebecca L. Taylor<sup>\*‡a</sup>, Jason D. Tack<sup>‡b</sup>, David E. Naugle, L. Scott Mills

Wildlife Biology Program, University of Montana, Missoula, Montana, United States of America

## Abstract

Species of conservation concern are increasingly threatened by multiple, anthropogenic stressors which are outside their evolutionary experience. Greater sage-grouse are highly susceptible to the impacts of two such stressors: oil and gas (energy) development and West Nile virus (WNV). However, the combined effects of these stressors and their potential interactions have not been quantified. We used lek (breeding ground) counts across a landscape encompassing extensive local and regional variation in the intensity of energy development to quantify the effects of energy development on lek counts, in years with widespread WNV outbreaks and in years without widespread outbreaks. We then predicted the effects of well density and WNV outbreak years on sage-grouse in northeast Wyoming. Absent an outbreak year, drilling an undeveloped landscape to a high permitting level (3.1 wells/km<sup>2</sup>) resulted in a 61% reduction in the total number of males counted in northeast Wyoming (total count). This was similar in magnitude to the 55% total count reduction that resulted from an outbreak year alone. However, energy-associated reductions in the total count resulted from a decrease in the mean count at active leks, whereas outbreak-associated reductions resulted from a near doubling of the lek inactivity rate (proportion of leks with a last count = 0). Lek inactivity quadrupled when 3.1 wells/km<sup>2</sup> was combined with an outbreak year, compared to no energy development and no outbreak. Conservation measures should maintain sagebrush landscapes large and intact enough so that leks are not chronically reduced in size due to energy development, and therefore vulnerable to becoming inactive due to additional stressors.

**Citation:** Taylor RL, Tack JD, Naugle DE, Mills LS (2013) Combined Effects of Energy Development and Disease on Greater Sage-Grouse. PLoS ONE 8(8): e71256. doi:10.1371/journal.pone.0071256

**Editor:** Justin David Brown, University of Georgia, United States of America

**Received:** March 6, 2013; **Accepted:** June 27, 2013; **Published:** August 5, 2013

**Copyright:** © 2013 Taylor et al. This is an open-access article distributed under the terms of the Creative Commons Attribution License, which permits unrestricted use, distribution, and reproduction in any medium, provided the original author and source are credited.

**Funding:** The Bureau of Land Management's Buffalo and Miles City Field Offices funded this project under BLM Contract 09-3225-0012 Number G09AC00013. The funders had no role in study design, data analysis, decision to publish, or preparation of the manuscript. They did collect some, but not all of the data the authors used as part of their routine monitoring efforts.

**Competing Interests:** The authors have declared that no competing interests exist.

\* E-mail: rebeccataylor@usgs.gov

<sup>‡a</sup> Current address: U. S. Geological Survey, Alaska Science Center, Anchorage, Alaska, United States of America

<sup>‡b</sup> Current address: Graduate Degree Program in Ecology, Colorado State University, Fort Collins, Colorado, United States of America

## Introduction

Population response to multiple stressors is among the top ten priorities for science to inform conservation and management policy in the United States [1]. Multiple stressors precipitate the extinction of species [2], and limited understanding of cumulative and interactive effects hamper assessments required by the National Environmental Policy Act and the Endangered Species Act [3], [1]. Oil and gas (energy) development is an ongoing stressor to wildlife populations on lands throughout the western United States [4], and in 2002, West Nile virus (WNV) emerged as an additional stressor to these populations [5]. The greater sage-grouse (*Centrocercus urophasianus*; sage-grouse) in northeast Wyoming provides a case study demonstrating the potential consequences of multiple stressors, such as energy development and disease, on a species of conservation interest.

The sage-grouse is a sagebrush (*Artemisia spp.*) obligate species [6], and habitat loss and degradation has resulted in a  $\geq 4$  decade long population decline [7], [8]. The species currently occurs in 11 western states and occupies  $\leq 54\%$  of its pre-European settlement range [9]. Wyoming provides habitat for nearly 40% of the range-wide population [10], and landscapes being developed for energy extraction in Wyoming contain some of the highest sage-grouse

abundances in North America [11]. Breeding sage-grouse populations are severely impacted at commonly permitted oil and gas well densities [12]. Impacts have been low or indiscernible at the lowest level (0.4 wells/km<sup>2</sup>), but at medium and high levels (1.5 and 3.1 wells/km<sup>2</sup>), losses on breeding grounds (leks) have been 2–5 times greater inside than outside of development, and number of males counted at remaining leks declined by 32 to 77% [13]. West Nile virus is a known stressor which may compound the impacts from oil and gas development [14]. Severe WNV outbreaks have been observed in Wyoming's sage-grouse populations since 2003 [15], and mortality from the disease could reduce population growth by an average of 6–9% per year [14]. In response to sage-grouse population declines in Wyoming, conservation areas (termed 'core areas') in which new energy development is restricted were delineated in 2008 [16].

While negative impacts of energy development on sage-grouse populations have been demonstrated in multiple study areas via demographic studies and counts of males on leks [12], research in areas of concentrated development [17], [18], [19] has detected impacts at smaller spatial extents than have regional studies [20], [21]. In addition, anthropogenic stressors such as energy development have been hypothesized to interact with WNV to

exacerbate sage-grouse population declines [14]; however, this hypothesis has yet to be tested.

Reasons for differing estimates of the scale at which energy development impacts sage-grouse, and the untested interaction between energy and disease impacts likely stem from similar challenges in estimating stressor effects. Stressor studies are usually first conducted on a relatively small scale, at sites close to development. A small scale study near development provides a natural starting point, as the study is focused on the source of the impact, and the small spatial scale affords researchers some control over confounding factors, such as vegetation and landscape, that may mask a response to development. However, if the entire study area is close to development, effects at impacted sites may appear artificially small because the nominal control areas may also be affected by development [22]. A small scale study close to development becomes particularly problematic when multiple stressors and their potential interactions are considered. Correctly quantifying multiple main effects and interactions requires more than data with a wide range of intensities for each stressor. It also requires that the different intensities for any one stressor be observed in combination with the different intensities of each of the other stressors [23].

The goals of our research were threefold. First, we aimed to identify the scale of energy impacts to leks, using data that encompassed both local and regional variation in levels of energy development. Second, we developed a model and tested for interactions between energy development and WNV outbreak years, again accounting for both local and regional variation in levels of energy development. Third, we used our model to predict the effects of energy development on sage-grouse in the presence and absence of a WNV outbreak year in a heavily developed area of Wyoming, where energy development is an ongoing threat to sage-grouse populations.

## Methods

### Study region

While our primary interest was in northeast Wyoming, this area contains such extensive energy development that we widened our study region to encompass less developed and undeveloped areas as well. Our study region covered 20 million ha of eastern Montana, northeast Wyoming and the western Dakotas, encompassing most of the Western Association of Fish and Wildlife Agencies (WAFWA) sage-grouse Management Zone I (Fig. 1). The region is generally dominated by large stands of sagebrush, with an understory of native and nonnative grasses and forbs. Dominant land uses are a mixture of cattle grazing and tillage agriculture, interspersed with concentrated areas of energy development [18]. West Nile virus is omnipresent throughout the region [24].

The tradeoff for having a large-scale study capturing large regional variation in energy development was that detailed, accurate vegetation data were unavailable for such a vast expanse of land. Thus, to capture variation in lek size due to natural landscape attributes within the region, we divided the study region into five sub-areas (Fig. 1), based on the WAFWA sage-grouse subpopulation designations [7]. Sub-areas included our focal area, northeast Wyoming, and the four sub-areas that added varied stressor intensities to our analyses: north-central Montana, central Montana, eastern Montana and western Dakotas.

### Data Sources

We defined a sage-grouse lek as a site where multiple males have been recorded displaying on multiple visits [18]. We obtained lek count and location data from the government agencies

responsible for maintaining these data. We censored any leks with errors detected, in conjunction with agency personnel, as well as leks known to be destroyed by housing subdivisions or mining. If a lek was counted multiple times within a year, we used the maximum count for that year [18], [25].

Because leks often occur in a complex, with males moving among leks within 2.5 km of each other, we defined the largest and most regularly attended lek in the group as the complex center [7]. We used the count from each complex center to represent the entire complex, eliminating from the database counts from the smaller and less attended satellite leks. Hereafter, the term 'lek' refers to the sample unit of our analyses, which includes complex centers and single leks that were not part of a complex.

For each lek, we used the value of the most recent count that was collected between 2003 and 2009 (last count), excluding from the analyses any leks that became inactive (count = 0) before 2003 and remained inactive on all subsequent counts. We used a single, post-2002 count instead of a time series analysis for two reasons. First, only a small, non-random group of leks have sufficient data to support a time series analysis. Second, we restricted our study to the years after which WNV was first detected in the study region. West Nile virus was first detected in the study region in 2002 [5], but leks are counted in early spring, before the majority of WNV transmission occurs in late summer, thus the effects of the disease could not have been apparent in lek counts until spring, 2003.

Energy development was quantified by the density of producing oil and gas wells near the lek on April 1 in the sample year. We defined the sample year as the year of the last count, both for active leks (last count > 0) and for the inactive leks (last count = 0) that had a positive penultimate count. For inactive leks with an unbroken string of zero counts, the sample year was the year of the first zero count. We calculated well density within the following radii of leks to capture a range of potential ecological and management processes relevant to sage-grouse: 1.0 km, 3.2 km, 5 km, 10 km, and 15 km and 20 km. Processes that impact breeding birds at leks should be captured by the 1 km radius [18]. The 3.2 km radius was previously found to be a best-fit scale for detecting energy impacts [18], and it has been used to implement some drilling restrictions [16] and to predict lek losses due to energy development [13]. Telemetry studies in the eastern portion of the sage grouse range (Management Zone 1, Fig. 1) have found that over 95% of nests are within 15 km of the lek at which the female was captured [26], [20]. Finally, effects in our study region have previously been discerned as far as 20 km from development [21]. Because lag times have previously been used in analyses that correlated well density with lek inactivity [17], [18], [19], we initially explored the effect of incorporating a 1–10 year lag time between the sample year and the measured well density. Real time measurements consistently outperformed lagged measurements in the initial analyses, thus we dropped lag times from subsequent analyses.

West Nile virus outbreaks were documented in multiple species in the summers of 2003 and 2007 [5], and outbreaks in sage-grouse populations in Montana, Wyoming, and South Dakota severely impacted survival and nearly extirpated at least one population [14], [15], [24], [27]. Because these outbreaks had the potential to affect spring 2004 and 2008 lek counts, respectively, we assigned positive outbreak year status to each lek whose sample year was 2004 or 2008. Although we refer simply to 'WNV outbreak years', we note that other environmental variables may have been associated with those years and may partly explain the population-level effects that occurred during WNV outbreak years.

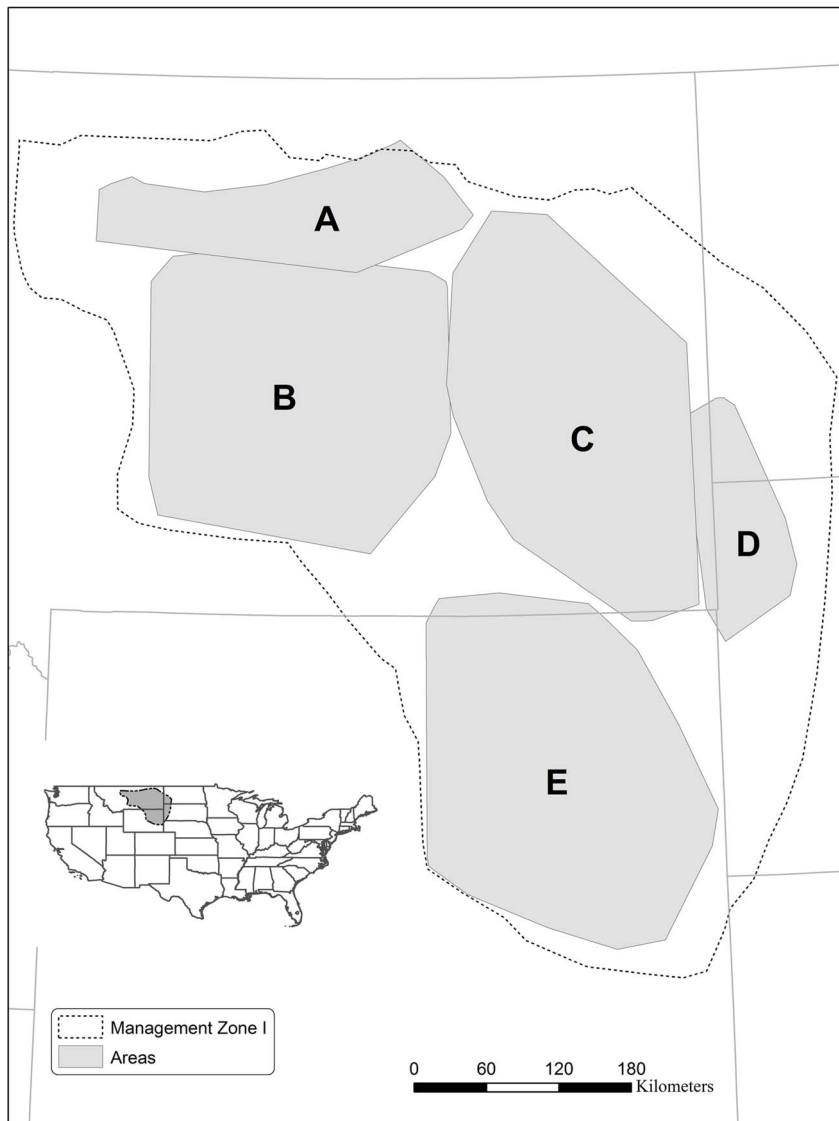

**Figure 1. Study region and the sub-areas it contains.** A) North-central Montana, B) Central Montana, C) Eastern Montana, D) Western Dakotas, and E) Northeast Wyoming.

doi:10.1371/journal.pone.0071256.g001

## Statistical analyses

**Model Structure.** Our analyses were based on lek count regressions. Using lek counts allowed us to estimate the immediate relationship between stressors and the total number of males in a sub-area by simultaneously estimating lek activity and the number of males at active leks. Most lek count analyses have been based on activity-inactivity data, and have thus needed to incorporate lag times to account for the time energy development takes to deplete leks to the point of inactivity (e.g. [17], [18], [19]).

We used a zero-inflated negative binomial (ZINB) likelihood function, which is ideally suited to overdispersed count data, where the variance is a strongly increasing function of the mean, and there are an unusually large number of zero counts [28]. The ZINB is a mixture of a negative binomial distribution and a point mass at zero, meaning that some zero counts are generated by the negative binomial distribution, and some are generated by the point mass of zeros, but all positive counts come from the negative binomial distribution. We parameterized the ZINB so the negative

binomial distribution was described by a mean and overdispersion parameter, and the mixing parameter (which governs the amount of zero-inflation) was the probability that a count belonged to the negative binomial distribution. We used a log link for the negative binomial mean and a logit link for the mixing parameter.

We used randomized quantile residuals [29] to validate the fit of the ZINB likelihood function to the data. Unlike most generalized linear model residuals that exhibit only asymptotic normality, randomized quantile residuals are normally distributed, provided the data are distributed according to the specified likelihood function. Thus we used these residuals to verify that the ZINB was an appropriate likelihood function. We used profile likelihood confidence intervals for parameters and 10,000 case-based, nonparametric bootstrap samples to estimate 95% confidence bands for predicted lines. All analyses were conducted in the R programming environment, version 2.10.0 [30].

**Identifying spatial extent of energy impacts.** To identify the spatial scale at which energy impacts to sage-grouse leks are

best detected, we repeated, for each radius, a regression of lek count against well density. Each regression used the same well density to predict the negative binomial mean (NB component) and the mixing parameter (ZI component). We compared the resulting six non-nested models with AIC [31]. Because the six models all had the same number of parameters, this procedure was equivalent to comparing the models' maximum likelihood values.

**Testing for interactions and reducing the model.** To test for interactions between energy development and WNV outbreak years, we first fit a saturated model that contained each of the following effects for both the NB and ZI components: well density (measured at the best-fit radius obtained above), a factor for WNV outbreak year, a well density by outbreak year interaction, and a factor for sub-area. The factor for sub-area adjusted for differences in lek size due to natural variation across the study region, allowing for the possibility that leks might be naturally larger or smaller in northeast Wyoming (where most of the high well densities exist) than in other parts of the study region. We tested each interaction term separately using a likelihood ratio test to determine if it was significant ( $p \leq 0.05$ ). To obtain a reduced model with which to make predictions, we first removed any non-significant interactions. We then tested the significance of main effects on which significant interactions did not depend, and removed any with  $p > 0.05$ .

**Predictions.** We used our reduced model to predict the effects of different well densities on lek counts in the northeast Wyoming sub-area, subsequent to a WNV outbreak year, and absent an outbreak year. We make predictions for well densities up to the highest federal permitting level of 3.1 wells/km<sup>2</sup>, which is similar to the maximum well density observed at the 20 km radius (2.9 wells/km<sup>2</sup>), and below the maximum well density at all other radii (3.6–7.9 wells/km<sup>2</sup>).

In particular, we used the estimated parameters to calculate the probability a lek was active, the mean count at active leks, and the total northeast Wyoming lek count (total count). We obtained the total count as the product of the mean count at all leks (whether or not they were active) and the number of leks from northeast Wyoming. We also calculated the number of leks that would be inactive (0 males), as well as the number in small (<11 males), medium (11–25 males) and large (>25 males) size categories [20], by calculating the probability a lek would fall into a category and multiplying it by the number of leks from northeast Wyoming.

## Results

### Identifying spatial extent of energy impacts

When lek count was regressed on well density alone, the 20 km radius explained the variation in the data better than did 4 of the 5 other radii ( $\Delta\text{AIC} > 2$ , Table 1). While the 20 km radius provided a nominally better fit than did the 5 km radius, it was statistically indistinguishable ( $\Delta\text{AIC} < 2$ ). To confirm whether or not the 20 km radius better explained the variation in the data than did the 5 km radius, we compared AIC values for these two radii using the saturated model. The 5 km radius had a  $\Delta\text{AIC}$  value  $> 4$  points higher than the 20 km radius, confirming the best fit was achieved using the 20 km radius.

### Sample sizes of leks subject to different stressors

Our analysis used 1139 leks, 60% of which had producing oil and gas wells within the best-fit 20 km radius, and 40% of which did not (Table 2). Twenty percent of leks were assigned a positive outbreak year status, and 80% were not: this did not depend on the presence or absence of oil and gas wells within 20 km. Leks in different sub-areas were subject to different levels of stressors,

**Table 1.**  $\Delta\text{AIC}$  values from univariate and saturated models used to determine the best fit radius from a lek within which to measure the density of oil and gas wells.

| Radius (km) | $\Delta\text{AIC}$ |           |
|-------------|--------------------|-----------|
|             | Univariate         | Saturated |
| 20.0        | 0.00               | 0.00      |
| 5.0         | 1.44               | 4.89      |
| 15.0        | 2.09               | NA        |
| 1.0         | 4.50               | NA        |
| 3.2         | 4.52               | NA        |
| 10.0        | 4.78               | NA        |

doi:10.1371/journal.pone.0071256.t001

underscoring the need for our study region to include sub-areas beyond the northeast Wyoming focal area. The percent of leks within 20 km of oil or gas wells varied from 29% in north-central Montana to 100% in northeast Wyoming, and the percent of leks with positive outbreak year status varied from 11% in the western Dakotas to 27% in eastern Montana.

### Testing for interactions and reducing the model

Interactions between well density and outbreak year were significant in the ZI ( $p = 0.0051$ ) and NB ( $p = 0.0058$ ) components. The coefficient for the ZI interaction was negative, meaning there was more zero-inflation at high well densities in an outbreak year compared to a non-outbreak year. The coefficient for the NB interaction was positive, meaning the negative binomial mean was higher at high well densities in an outbreak year compared to a non-outbreak year. The final model contained all effects from the saturated model (Table 3), including the factors for sub-area (NB component,  $p = 2 \times 10^{-12}$ ; ZI component,  $p = 2 \times 10^{-22}$ ). Because the interactions between well density and outbreak year were significant, we did not test the underlying main effects for removal. Nevertheless, the main effect of well density was seen primarily in the NB component where the distribution's mean decreased with increasing well density. The main effect of outbreak year was seen primarily in the ZI component, where zero-inflation was higher in outbreak years. Both of these main effects are reflected by parameter confidence intervals that do not overlap zero.

### Predictions

**Effect of Well Density in the Absence of an Outbreak Year.** Absent an outbreak-year, drilling an undeveloped landscape to the permitting level of 3.1 wells/km<sup>2</sup> reduced the predicted total northeast Wyoming count (total count) by 61% (Fig. 2A, Table 4), from an estimated 4537 males to 1768 males. Underscoring the strength of this reduction are the non-overlapping 95% confidence intervals [CI: 3668, 5507] and [CI: 1162, 2554]. The decrease in the total count was caused by the decrease in the mean count at active leks, which declined from 18 [CI: 15, 22] to 6 [CI: 5, 9] (Fig. 2B). Furthermore, the decreasing mean count at active leks resulted from fewer large and medium-sized leks and more small leks (Table 4). For example, the 60 [CI: 42, 80] large leks predicted to exist if northeast Wyoming had no oil and gas development decreased to 2 [CI: 0, 10] with development to 3.1 wells/km<sup>2</sup>. Conversely, the 91 [CI: 73, 111] small leks predicted to exist without development increased to 232 [CI: 180, 266] at 3.1 wells/km<sup>2</sup>. Lek inactivity rates, however,

**Table 2.** Sample sizes of leks in study region categorized by sub-area, presence of wells within the 20 km best-fit radius and whether or not the lek was assigned positive WNV outbreak year status.

|            | WNV? | Wells? | Area               |                    |                   |                   | Category Total |                   |
|------------|------|--------|--------------------|--------------------|-------------------|-------------------|----------------|-------------------|
|            |      |        | NE WY <sup>1</sup> | NC MT <sup>2</sup> | C MT <sup>3</sup> | E MT <sup>4</sup> |                | W DK <sup>5</sup> |
|            | No   | No     | 1                  | 88                 | 126               | 144               | 15             | 374               |
|            | No   | Yes    | 304                | 35                 | 84                | 64                | 57             | 544               |
|            | Yes  | No     | 0                  | 12                 | 25                | 54                | 2              | 93                |
|            | Yes  | Yes    | 65                 | 6                  | 27                | 23                | 7              | 128               |
| Area Total |      |        | 370                | 141                | 262               | 285               | 81             | 1,139             |

<sup>1</sup>Northeast Wyoming.<sup>2</sup>North-central Montana.<sup>3</sup>Central Montana.<sup>4</sup>Eastern Montana.<sup>5</sup>Western Dakotas.

doi:10.1371/journal.pone.0071256.t002

remained relatively constant between and 24% [CI: 15%, 38%] and 33% [CI: 26%, 41%], regardless of well density (Fig. 2C).

**Effect of Outbreak Year in the Absence of Oil and Gas Development.** In the absence of energy development, we predicted a WNV outbreak year would cause the total count to decline by 55% (4537 [CI: 3668, 5507] to 2037 [CI: 1318, 3062]), which is similar to the 61% reduction achieved by drilling to 3.1 wells/km<sup>2</sup>. The outbreak year reduction in the total count was driven by a near doubling of lek inactivity, from 33% (26%, 41%) to 65% (51%, 75%). The mean count at active leks remained relatively constant between 16 [CI: 12, 20] and 18 [CI: 15, 22] males.

**Table 3.** Maximum likelihood estimates and profile likelihood confidence intervals for parameters of the reduced model.

| Parameter                      | Component <sup>1</sup> MLE | CI                      |
|--------------------------------|----------------------------|-------------------------|
| Overdispersion                 | NB                         | 1.539 (1.354, 1.738)    |
| Intercept                      | ZI                         | 2.897 (2.240, 3.077)    |
| Intercept                      | NB                         | 3.352 (3.211, 3.499)    |
| Central Montana                | ZI                         | -1.431 (-2.329, -0.711) |
| Central Montana                | NB                         | -0.413 (-0.600, -0.228) |
| Eastern Montana                | ZI                         | -1.047 (-1.949, -0.305) |
| Eastern Montana                | NB                         | -0.809 (-0.997, -0.624) |
| Western Dakotas                | ZI                         | -0.652 (-1.778, 0.618)  |
| Western Dakotas                | NB                         | -1.023 (-1.277, -0.764) |
| Northeast Wyoming              | ZI                         | -2.135 (-3.044, -1.402) |
| Northeast Wyoming              | NB                         | -0.463 (-0.672, -0.254) |
| Well Density                   | ZI                         | 0.269 (-0.079, 0.656)   |
| Well Density                   | NB                         | -0.369 (-0.505, -0.230) |
| Outbreak Year                  | ZI                         | -1.328 (-1.732, -0.930) |
| Outbreak Year                  | NB                         | -0.168 (-0.351, 0.019)  |
| Well*Outbreak Year Interaction | ZI                         | -1.406 (-2.751, -0.380) |
| Well*Outbreak Year Interaction | NB                         | 0.765 (0.199, 1.514)    |

<sup>1</sup>Parameters belonging to the negative binomial (NB) model component are presented on the log scale. Parameters belonging to the zero-inflation (ZI) model component (mixing parameter) are presented on the logit scale. The mixing parameter was defined as the probability that a count belonged to the negative binomial distribution.

doi:10.1371/journal.pone.0071256.t003

**Combined Effects of Well Density and Outbreak Year.** The mean inactivity rate associated with outbreak years increased with increasing energy development, but with high variation around predictions. The 65% [CI: 51%, 75%] inactivity rate predicted without development rose to 98% [CI: 74%, 100%] with development to 3.1 wells/km<sup>2</sup>.

While the mean count at active leks subsequent to an outbreak year increased with increasing energy development, this result was unreliable. Unrealistically large confidence intervals for active leks with high well densities and positive outbreak year status precluded meaningful predictions for their mean count (Fig. 2D). With an outbreak year and no oil and gas development, the mean count at active leks was 18 [CI: 15, 22]. With an outbreak year and 3.1 wells/km<sup>2</sup>, the confidence interval had a lower limit of 1 and an upper limit of 594 males, compared to a maximum lek count of 115 males in the raw data. This uncertainty is a direct result of how few active leks in areas of high oil and gas development were last counted after an outbreak year. In particular, of the 1139 leks in our analysis, only 2 that were last counted subsequent to a WNV outbreak year were also active and had well densities >1.5 wells/km<sup>2</sup> in the 20 km radius.

The uncertainty in the mean count at active leks with high well densities and an outbreak year is also reflected in the expected total count under these conditions. However, at lower well densities, the relationship between well density, outbreak year and total count is less variable. For example, at 0.75 wells/km<sup>2</sup>, we predicted an outbreak year would produce a total count of 1473 [CI: 65, 2616] males, 40% of the 3648 [CI: 3147, 4204] males predicted at the same well density subsequent to non-outbreak year.

## Discussion

Energy development and WNV are both outside the sage-grouse evolutionary experience, and our work is the first to quantify their combined effects, across a 20 million ha region encompassing a wide range of stressor intensities. Combinations of stressors are important drivers of extinction, particularly when they are outside the evolutionary experience of a species [2]. The doubling of lek inactivity rates as a result of outbreak years is consistent with the extreme susceptibility of sage-grouse to this novel disease [32] and near population extirpation observed in the field [15]. Furthermore, our work shows the progression of effects on lek counts previously documented as a 2–10 year time lag between the onset of development and lek inactivity [17], [18], [19]. We demonstrate



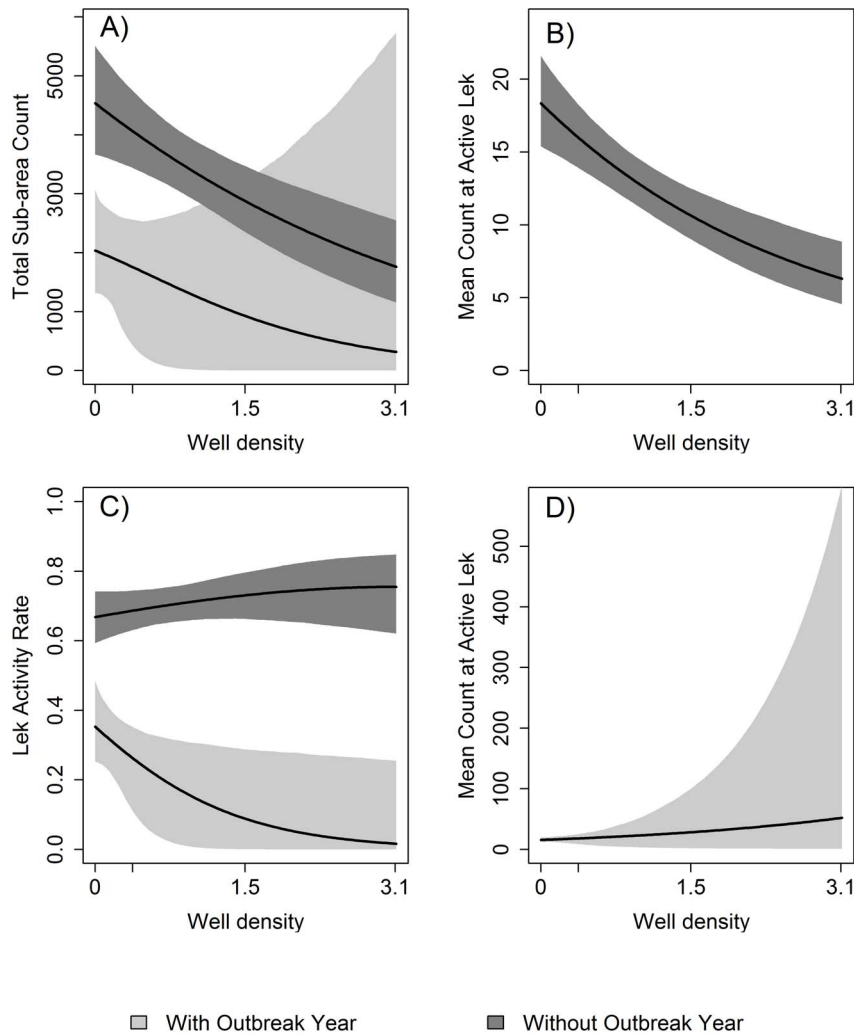

**Figure 2. Predictions for Northeast Wyoming sage-grouse.** Lines show expected values, and shaded areas are 95% confidence regions. Oil and gas well density is given in # wells/km<sup>2</sup> within a 20 km radius of each lek. A) Total count of male sage-grouse on all leks in northeast Wyoming, B) Mean count of male sage-grouse at active leks absent a WNV outbreak year, C) Proportion of leks that are active, and D) Mean count of male sage-grouse at active leks subsequent to a WNV outbreak year. Note difference in scale of y-axis between B and D. doi:10.1371/journal.pone.0071256.g002

an immediate decrease in lek size due to increasing well density, increased inactivity subsequent to outbreak years, and an inactivity rate subsequent to outbreak years that is worsened by high levels of oil and gas development.

Multiple mechanisms may underlie the synergistic effects of energy development and outbreak years on lek inactivity. First, the prevalence of WNV may be higher within coal bed natural gas fields [14], [18] because ponds created from ground water brought to the surface during gas extraction provide additional habitat for the mosquito, *Culex tarsalis*, a known WNV vector [15], [33], [34], [35]. On the other hand, increasing inactivity of small leks after outbreak years could have resulted from other unfavorable environmental conditions associated with the outbreak years in our analyses. For example, higher summer temperatures can increase WNV transmission [14], but high temperatures can also be associated with drought, which can affect range conditions, and as a result, chick production [36]. We suggest that reductions in the size of active leks as a result of energy development may set the stage for other stressors to cause lek inactivity, because sage-grouse

populations in developed areas are already small, and vulnerable to stochastic events [37]. While WNV is a major threat to sage-grouse in the eastern portion of their range, and one whose outbreaks correlate well with lek inactivity, it is but one threat to populations already reduced by energy development. In other areas, events such as wildfire are as much or more of a threat to sage-grouse than WNV [38], and they, too, might become the final straw for populations reduced by energy development. Moreover, species like sage-grouse, whose productivity and population growth rate vary markedly from year to year [39], may be particularly vulnerable to extirpation from even a single stressor. The high variation in population growth guarantees episodic years in which the species fares poorly, thus reduced population size due to one stressor may be exacerbated to the point of extirpation as a result of natural fluctuations in population growth.

The scale at which sage-grouse are impacted by energy development now appears to be larger than initially thought. We suggest that sage-grouse may respond to energy development primarily at a large scale, and secondarily in close proximity to the

**Table 4.** Predicted total lek count and number of inactive (0 males), small (1–10 males), medium-sized (11–25 males) and large (>25 males) leks for northeast Wyoming as a function of oil and gas well density (#/km<sup>2</sup>) within 20 km of each lek and WNv outbreak or non-outbreak year status.

|                   |      | Without West Nile Virus Outbreak Year |          |            |      |            |      |                |              |          |      |        |  |  |
|-------------------|------|---------------------------------------|----------|------------|------|------------|------|----------------|--------------|----------|------|--------|--|--|
|                   |      | Total Lek Count                       |          |            |      |            |      | Number of Leks |              |          |      |        |  |  |
| Well Density      | Mean | 95% CI                                | Inactive |            |      | Small      |      |                | Medium-sized |          |      | Large  |  |  |
|                   |      |                                       | Mean     | 95% CI     | Mean | 95% CI     | Mean | 95% CI         | Mean         | 95% CI   | Mean | 95% CI |  |  |
| 0.00 <sup>3</sup> | 4537 | (3668, 5507)                          | 123      | (95, 151)  | 91   | (73, 111)  | 96   | (84, 108)      | 60           | (42, 80) |      |        |  |  |
| 0.39 <sup>3</sup> | 4062 | (3439, 4753)                          | 116      | (94, 136)  | 108  | (91, 125)  | 98   | (89, 108)      | 48           | (34, 62) |      |        |  |  |
| 0.75 <sup>1</sup> | 3648 | (3147, 4204)                          | 110      | (91, 129)  | 125  | (109, 142) | 99   | (90, 108)      | 37           | (26, 49) |      |        |  |  |
| 1.54 <sup>3</sup> | 2876 | (2352, 3471)                          | 100      | (75, 125)  | 163  | (138, 190) | 89   | (74, 103)      | 18           | (10, 29) |      |        |  |  |
| 2.87 <sup>2</sup> | 1895 | (1288, 2670)                          | 91       | (57, 137)  | 224  | (175, 259) | 52   | (25, 84)       | 3            | (0, 12)  |      |        |  |  |
| 3.09 <sup>3</sup> | 1768 | (1162, 2554)                          | 91       | (56, 140)  | 232  | (180, 266) | 46   | (19, 80)       | 2            | (0, 10)  |      |        |  |  |
|                   |      | With West Nile Virus Outbreak Year    |          |            |      |            |      |                |              |          |      |        |  |  |
|                   |      | Total Lek Count                       |          |            |      |            |      | Number of Leks |              |          |      |        |  |  |
| Well Density      | Mean | 95% CI                                | Inactive |            |      | Small      |      |                | Medium-sized |          |      | Large  |  |  |
|                   |      |                                       | Mean     | 95% CI     | Mean | 95% CI     | Mean | 95% CI         | Mean         | 95% CI   | Mean | 95% CI |  |  |
| 0.00 <sup>3</sup> | 2037 | (1318, 3062)                          | 239      | (191, 277) | 57   | (38, 82)   | 51   | (36, 69)       | 23           | (11, 41) |      |        |  |  |
| 0.39 <sup>3</sup> | 1757 | (430, 2558)                           | 273      | (240, 329) | 36   | (13, 53)   | 38   | (11, 51)       | 23           | (2, 37)  |      |        |  |  |
| 0.75 <sup>1</sup> | 1473 | (65, 2616)                            | 299      | (252, 361) | 23   | (2, 39)    | 27   | (1, 45)        | 21           | (0, 39)  |      |        |  |  |
| 1.54 <sup>3</sup> | 927  | (1, 3212)                             | 337      | (263, 370) | 7    | (0, 23)    | 11   | (0, 35)        | 14           | (0, 50)  |      |        |  |  |
| 2.87 <sup>2</sup> | 373  | (0, 5246)                             | 362      | (274, 370) | 1    | (0, 11)    | 2    | (0, 21)        | 5            | (0, 67)  |      |        |  |  |
| 3.09 <sup>3</sup> | 319  | (0, 5712)                             | 364      | (275, 370) | 1    | (0, 9)     | 1    | (0, 19)        | 4            | (0, 68)  |      |        |  |  |

<sup>1</sup>Mean well density in 2009 within a 20 km radius of northeast Wyoming leks.

<sup>2</sup>Maximum well density in 2009 within a 20 km radius of northeast Wyoming leks.

<sup>3</sup>Permitting levels for well density on United States federal land.

doi:10.1371/journal.pone.0071256.t004

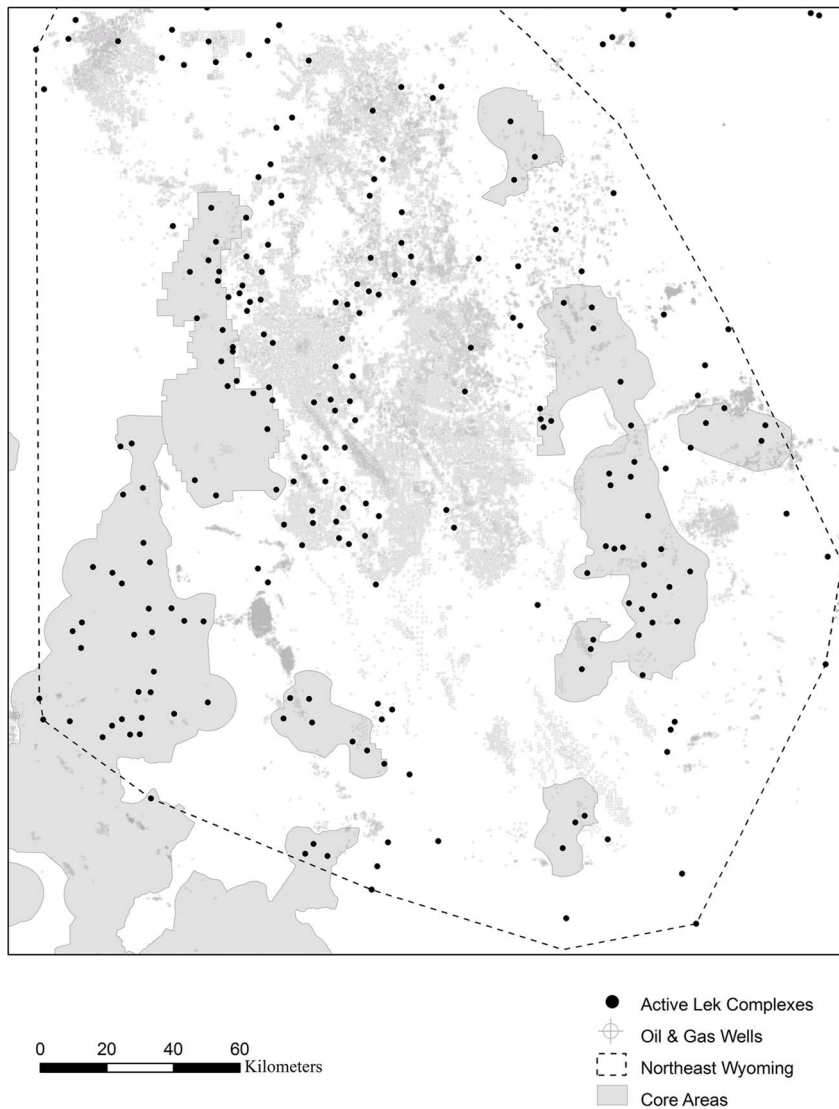

**Figure 3. Northeast Wyoming leks, oil and gas wells and core sage-grouse management areas.** As of 2009, the pictured leks were active and the pictured wells were producing.  
doi:10.1371/journal.pone.0071256.g003

lek. The primary, large-scale response of sage-grouse to energy development is supported both by our work and by previous studies that have found similarly large scales of impact in mostly undeveloped regions [20] or in regions that contained a mixture of highly developed and undeveloped areas [21]. The secondary, local response is supported by the comparatively small scales of impact in localities already developed for oil and gas extraction [17], [18], [19], [40], most of which were highly developed by the time of study [17], [18], [19]. If much of an area is already developed, effects at impacted sites may appear artificially small because the nominal control areas may also be affected by development [22]. Future research should further evaluate the possibility of oil and gas development having both large and small scale effects on sage-grouse populations.

A persistent problem in the conservation of declining populations is a disparity between the spatial scale of management actions and the scale at which populations respond [3]. When we account for

the large-scale response of sage-grouse to energy development, the effective size of core conservation areas designed to protect sage-grouse populations in northeast Wyoming becomes negligible. In fact, as of 2009, all active leks in northeast Wyoming had at least one producing oil and gas well within 20 km. This results from widespread oil and gas development in northeast Wyoming, its core areas having been selected after substantial energy development had already occurred, and boundaries having been delineated to include leks, but not necessarily a buffer between the lek and the development boundary (Fig. 3). While a lek provides an important center of breeding activity, and a conspicuous location at which to count birds, its size is merely an index to the population dynamics in the surrounding habitat. For example, in the eastern portion of their range (Management Zone 1), female sage-grouse captured on a lek use an approximately 15-km radius around the lek for nesting; by contrast, a 3.2-km radius (which is used for some drilling restrictions near leks) encompasses only 35–50% of nests



associated with the lek [26], [20]. Thus attempting to protect a lek, without protecting the surrounding habitat, provides little protection at all.

Coupling our findings with those of others [6] further characterizes sage-grouse as a wildland species that requires large, intact sagebrush landscapes, and is largely intolerant of human disturbance. Our work compliments new science from the western portion of the species' range where active leks have only 0.3% developed land within a 5 km radius compared to 8.7% at inactive leks [41]. To deliver conservation more effectively, each of 11 western sage-grouse states recently delineated core areas for conservation [42], and most policies restrict or eliminate new developments inside these areas of high bird abundance. Core area policy in Wyoming, for example, restricts new development to an average of one oil or gas well pad per 2.6 km<sup>2</sup>, places a 5% cap on total disturbance, and steers new drilling to less impactful places [16]. While abatement measures for WNV are sensible [14], placing new developments outside of core areas has the

greatest likelihood of sustaining populations. The 2012 Near-Term Greater Sage-Grouse Conservation Action Plan lays out a spatially explicit approach by identifying the threats for each core area, the appropriate conservation action to abate those threats, and the probability of success if those actions are fully implemented [43]. Our findings corroborate this spatial approach for reducing all stressors in core areas so that beneficial conservation measures are not negated by detrimental actions.

## Acknowledgments

Christian Hagen and Terry Messmer improved this manuscript through thorough reviews, and Gary Drew and Vanessa von Biela provided helpful comments on previous versions of the manuscript.

## Author Contributions

Conceived and designed the experiments: RT JT DN LM. Analyzed the data: RT. Wrote the paper: RT JT DN LM. Provided funding: DN.

## References

- Fleishman E, Blockstein DE, Hall JA, Mascia MB, Rudd MA, et al. (2011) Top 40 Priorities for Science to Inform US Conservation and Management Policy. *BioScience* 61: 290–300.
- Brook BW, Sodhi NS, Bradshaw CJA (2008) Synergies among extinction drivers under global change. *Trends in Ecology and Evolution* 23: 453–460.
- Schultz C (2010) Challenges in connecting cumulative effects analysis to effective wildlife conservation planning. *Bioscience* 60: 545–551.
- McDonald RI, Fargione J, Kiesecker J, Miller WM, Powell J (2009) Energy sprawl or energy efficiency: climate policy impacts on natural habitat for the United States of America. *PLoS One* DOI:10.1371/journal.pone.0006802.
- Centers for Disease Control (2010) West Nile virus: statistics, surveillance and control. Available: [http://www.cdc.gov/ncidod/dvbid/westnile/surv&control\\_archive.htm](http://www.cdc.gov/ncidod/dvbid/westnile/surv&control_archive.htm). Accessed 2010 Aug 06.
- Connelly JW, Knick ST, Braun CE, Baker WL, Beever EA, et al. (2011) Conservation of greater sage-grouse: a synthesis of current trends and future management. *Studies in Avian Biology* 38: 549–564.
- Connelly JW, Knick ST, Schroeder MA, Stiver SJ (2004) Conservation assessment of greater sage-grouse and sagebrush habitats. Western Association of Fish and Wildlife Agencies. Cheyenne, Wyoming. 610 p.
- Garton EO, Connelly JW, Hagen CA, Horne JS, Moser A, et al. (2011) Greater sage-grouse population dynamics and probability of persistence. *Studies in Avian Biology* 38: 293–381.
- Schroeder MA, Aldridge CL, Apa AD, Bohn JR, Braun CE, et al. (2004) Distribution of sage-grouse in North America. *Condor* 106: 363–376.
- Doherty KE, Tack JD, Evans JS, Naugle DE (2010) Mapping breeding densities of greater sage-grouse: a tool for range-wide conservation planning. Completion report to the Bureau of Land Management for Interagency Agreement No. L10PG00911, Washington, D.C. 29 p.
- Doherty KE, Naugle DE, Copeland H, Poczewicz A, Kiesecker J (2011) Energy development and conservation tradeoffs: systematic planning for sage-grouse in their eastern range. *Studies in Avian Biology* 38: 505–516.
- Naugle DE, Doherty KE, Walker BL, Holloran MJ, Copeland HE (2011) Energy development and greater sage-grouse. *Studies in Avian Biology* 38: 489–503.
- Doherty KE, Naugle DE, Evans JS (2010) A currency for offsetting energy development impacts: horse-trading sage-grouse on the open market. *PLoS One* DOI: 10.1371/journal.pone.00110339
- Walker BL, Naugle DE (2011) West Nile virus ecology in sagebrush habitats and impacts on greater sage-grouse populations. *Studies in Avian Biology* 38: 127–142.
- Walker BL, Naugle DE, Doherty KE, Cornish TE (2004) Outbreak of West Nile virus in greater sage-grouse and guidelines for monitoring, handling, and submitting dead birds. *Wildlife Society Bulletin* 32: 1000–1006.
- Wyoming Office of the Governor (2011) Greater sage-grouse core area protection. Executive Order EO-2011-5. Available: <http://governor.wy.gov/Documents/Sage%20Grouse%20Executive%20Order.pdf> Accessed 2013 Jul 6.
- Holloran MJ (2005) Greater sage-grouse (*Centrocercus urophasianus*) population response to natural gas field development in western Wyoming [Dissertation]. Laramie: University of Wyoming. 114 p.
- Walker BL, Naugle DE, Doherty KE (2007) Greater sage-grouse population response to energy development and habitat loss. *Journal of Wildlife Management* 71: 2644–2654.
- Harju SM, Dzialaka MR, Taylor RC, Hayden-Wing LD, Winstead JB (2010) Thresholds and time lags in effects of energy development on greater sage-grouse populations. *Journal of Wildlife Management* 74: 437–448.
- Tack JD (2009) Sage-grouse and the human footprint: implications for conservation of small and declining populations [Thesis]. Missoula: University of Montana. 106 p.
- Johnson DH, Holloran MJ, Connelly JW, Hanser SE, Amundson CL, et al. (2011) Influences of environmental and anthropogenic features on greater sage-grouse populations, 1997–2007. *Studies in Avian Biology* 38: 407–450.
- Reinjen R, Foppen R (1995) The effects of car traffic on breeding bird populations in woodland. IV. Influence of population size on the reduction of density close to a highway. *Journal of Applied Ecology* 32: 481–491.
- Hebblewhite M (2011) Effects of energy development on ungulates. In Naugle DE, editor. *Energy development and wildlife conservation in western North America*. Washington, D.C.: Island Press. pp. 71–94.
- Naugle DE, Aldridge CL, Walker BL, Cornish TE, Moynahan BJ, et al. (2004) West Nile virus: pending crisis for Greater Sage-Grouse. *Ecology Letters* 7: 704–713.
- Fedy BC, Aldridge CL (2011) The importance of within-year repeated counts and the influence of scale on long-term monitoring of sage-grouse. *Journal of Wildlife Management* 75: 1022–1033.
- Holloran MJ, Anderson SH (2005) Spatial distribution of greater sage-grouse nests in relatively contiguous sagebrush habitats. *Condor* 107: 742–752.
- Naugle DE, Aldridge CL, Walker BL, Doherty KE, Matchett MR, et al. (2005) West Nile virus and sage-grouse: what more have we learned? *Wildlife Society Bulletin* 33: 1–8.
- Hardin JW, Hilbe HM (2007) *Generalized Linear Models and Extensions*, 2<sup>nd</sup> edition. College Station: Stata Press. 553 p.
- Dunn PK, Smyth GK (1996) Randomized quantile residuals. *Journal of Computational and Graphical Statistics* 5: 236–244.
- R Development Core Team. 2009. R: A language and environment for statistical computing. Vienna: R Foundation for Statistical Computing.
- Burnham KP, Anderson DR (1998) *Model selection and inference: a practical information-theoretic approach*. New York: Springer-Verlag. 353 p.
- Clark L, Hall J, Mclean R, Dunbar M, Klenk K, et al. (2006) Susceptibility of greater sage-grouse to experimental infection with West Nile virus. *Journal of Wildlife Diseases* 42: 14–22.
- Zou L, Miller SN, Schmidtmann ET (2006) Mosquito larval habitat mapping using remote sensing and GIS: implications of coalbed methane development and West Nile virus. *Journal of Medical Entomology* 43: 1034–1041.
- Doherty MK (2007) Mosquito populations in the Powder River Basin, Wyoming: a comparison of natural, agricultural and effluent coal-bed natural gas aquatic habitats [Thesis]. Bozeman: Montana State University. 94p.
- Walker BL, Naugle DE, Doherty KE, Cornish TE (2007) West Nile virus and greater sage-grouse: estimating infection rate in a wild bird population. *Avian Diseases* 51: 691–696.
- Connelly JW, Schroeder MA, Sands AR, Braun CE (2000) Guidelines to manage sage-grouse populations and their habitats. *Wildlife Society Bulletin* 28: 967–985.
- Soule ME, Mills LS (1998) No need to isolate genetics. *Science* 282: 1658–1659.
- Murphy T, Naugle DE, Eardley R, Maestas JD, Griffiths T, et al. (2013) Trial by fire: improving our ability to reduce wildfire impacts to sage-grouse and sagebrush ecosystems through accelerated partner collaboration. *Rangelands*: In Press.
- Taylor RL, Walker BL, Naugle DE, Mills LS (2012) Managing multiple vital rates to maximize greater sage-grouse population growth. *Journal of Wildlife Management* 76: 336–347.

40. Hess JE, Beck JL (2012) Disturbance factors influencing greater sage-grouse lek abandonment in north-central Wyoming. *Journal of Wildlife Management* DOI: 10.1002/jwmg.417.
41. Knick ST, Hanser SE, Preston KL (2013) Modeling ecological minimum requirements for distribution of greater sage-grouse leks: implications for population connectivity across their western range, U.S.A. *Ecology and Evolution* DOI: 10.1002/ece3.557.
42. U.S. Fish and Wildlife Service (2013) Greater Sage-grouse (*Centrocercus urophasianus*) Conservation Objectives: Final Report. U.S. Fish and Wildlife Service, Denver, CO. 92 p.
43. Range-wide Interagency Sage-grouse Conservation Team (2012) Near-Term Greater Sage-Grouse Conservation Action Plan. Report to the Greater Sage-grouse Executive Oversight Committee and Sage-Grouse Task Force. Hilton Head, SC. 27 p.
